# Supplementary material for: Gpr177 Deficiency Impairs Mammary Development and Prohibits Wnt-Induced Tumorigenesis
Source: PLoS One. 2013 Feb 15;8(2):e56644. doi: 10.1371/journal.pone.0056644 (PMC3574013; doi:10.1371/journal.pone.0056644)

**Supporting Information**

Figure S3. The control experiment shows specificity of the immunostaining analyses. Sections of the v1M (A-C) and v2M (D-F) mammary glands were analyzed by immunostaining with only the goat (G2oAb), rabbit (R2oAb) or mouse (M2oAb) secondary antibodies. No signals (brown) were detected in the epithelial cells except for non specific reactivity in the fatty area. Scale bar, 50 m (A-F).


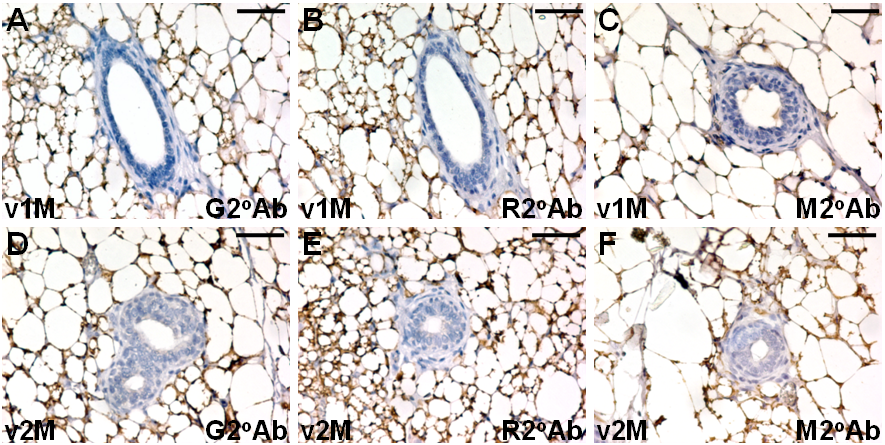

Supplement: Figure S3 — The control experiment shows specificity of the immunostaining analyses. Sections of the v1M (A–C) and v2M (D–F) mammary glands were analyzed by immunostaining with only the goat (G2°Ab), rabbit (R2°Ab) or mouse (M2°Ab) secondary antibodies. No signals (brown) were detected in the epithelial cells except for non specific reactivity in the fatty area. Scale bar, 50 µm (A–F). (DOC) [file pone.0056644.s003.doc]
